# Supplementary material for: Design and synthesis of a novel coumarin-based framework as a potential chemomarker of a neurotoxic insecticide, azamethiphos
Source: Royal Society of Chemistry journal article supplement (doi:10.1039/c9nj04805g), 2020-01-01
Supplement: c9nj04805g1.pdf [file c9nj04805g1.pdf]

## Supporting Information

### Design and chemical synthesis of a novel coumarin-based framework as a potential chemosensor of a neurotoxic insecticide, azamethiphos

Aman K.K. Bhasin<sup>a\*</sup>, Pushap Raj<sup>b</sup>, Pooja Chauhan<sup>c</sup>, Sanjay K. Mandal<sup>d</sup>, Savita Chaudhary<sup>c</sup>  
Narinder Singh<sup>b</sup>, Navneet kaur<sup>c</sup>

<sup>a</sup>DAV College, Sector 10, Chandigarh (India)-160010

<sup>b</sup>Department of Chemistry, Indian Institute Technology Ropar, Punjab, 140001, India.

<sup>c</sup>Department of Chemistry, Panjab University Chandigarh 160014, India

<sup>d</sup>Department of Chemical Sciences, Indian Institute of Science Education and Research, Sector 81, Manauli PO, S.A.S. Nagar, Mohali, Punjab, 140306, India

*\*Corresponding author* (Aman KK Bhasin); *E-mail:* [akkb8785@gmail.com](mailto:akkb8785@gmail.com); *Tel:* +91-8557895390.

## Contents

Figure S1.  $^1\text{H}$  NMR spectrum of ligand L in dms-*d*6.

Figure S2.  $^{13}\text{C}$  NMR spectrum of ligand L in dms-*d*6.

Figure S3. Mass spectrum of ligand L determined by electrospray ionization technique (ESI-MS).

Figure S4. Competitive binding experiment between  $\text{Cu}^{2+}$  and organic nanoparticles **A1** in the presence of competing metal ion pool.

Figure S5. Stern-volmer plot for determination of association constant ( $K_a$ ) between  $\text{Cu}^{2+}$  and organic nanoparticles, **A1**.

Figure S6. Job plot to determine the stoichiometry of the chemical coordination between the host ligand A1 and guest metal ion  $\text{Cu}^{2+}$ .

Figure S7.1  $^1\text{H}$  NMR titration of **A1** in presence and absence of  $\text{Cu}^{2+}$  in dms-*d*6 ( $\text{H}^a$  and  $\text{H}^b$  denote hydroxyl proton and iminic hydrogen of **A1**, respectively)

Figure S7.2  $^1\text{H}$  NMR titration of **A1** in presence of  $\text{Cu}^{2+}$  and azamethiphos in dms-*d*6 ( $\text{H}^a$  and  $\text{H}^b$  denote hydroxyl proton and iminic hydrogen of **A1**, respectively)

Figure S8. Benesi-Hildebrand plot to determine the binding constant between  $\text{Cu}^{2+}$ ·**A1** with azamethiphos where  $F_0$  and  $F$  denote the fluorescence emission intensity of the copper-bound receptor complex  $\text{Cu}^{2+}$ ·**A1** in the absence and presence of azamethiphos (analyte), respectively.  $[G]$  represents the molar concentration of azamethiphos.

Figure S9. Job plot to determine the stoichiometry of the binding interaction between the host complex  $\text{Cu}^{2+}$ ·**A1** and azamethiphos (analyte).  $[H]$  and  $[G]$  represent the molar concentration of the host complex  $\text{Cu}^{2+}$ ·**A1** and azamethiphos, respectively

Figure S10. Competitive binding experiment of copper-ligand ensemble ( $\text{Cu}^{2+}$ ·**A1**) towards azamethiphos in the presence of select organophosphate pesticides

Figure S11.  $^{31}\text{P}$  NMR spectrum of azamethiphos in the presence and absence of copper-ligand ensemble,  $\text{Cu}^{2+}$ ·**A1**

Figure S12. Fluorescence profile of  $\text{Cu}^{2+}$ ·**A1** ( $50\ \mu\text{M}$ ;  $\lambda_{\text{em}} = 430\text{nm}$ ) in presence of a library of select anions ( $50\ \mu\text{M}$ ) in aqueous medium

Figure S13. Fluorescence titration studies of azamethiphos ( $\lambda_{\text{em}} = 330\text{ nm}$ ) with  $\text{Cu}^{2+}$  ( $0- 50\ \mu\text{M}$ )

Figure S14. Fluorescence profile of azamethiphos ( $\lambda_{\text{em}} = 330\text{ nm}$ ) in the presence of (i)  $\text{Cu}^{2+}$  (ii) ligand (**A1**) and (iii) ligand-copper ensemble (**A1**· $\text{Cu}^{2+}$ )

Figure S15. Cyclical fluctuations in fluorescence intensity ( $\lambda_{em} = 430$  nm) of title ligand **A1** upon sequential dosage of azamethiphos (100 - 40  $\mu$ M) and  $Cu^{2+}$  (50-10  $\mu$ M) in an alternate pattern

Figure S16. Fluorescence studies in deionized water and select real water samples (tap water, rain water and well water) of (a) **A1** ( $\lambda_{em} = 430$  nm) upon spiking with  $Cu^{2+}$  (10, 20, 30, 40 and 50  $\mu$ M) and (b) **A1**· $Cu^{2+}$  ( $\lambda_{em} = 440$  nm) upon spiking with azamethiphos (10, 20, 30, 40 and 50  $\mu$ M)

Figure S17. Fully labeled molecular structure of ligand L

Table S1. Crystal data and structure refinement for ligand L

Table S2. Selected bond lengths ( $\text{\AA}$ ) of L

Table S3. Selected bond angles ( $A^\circ$ ) of L

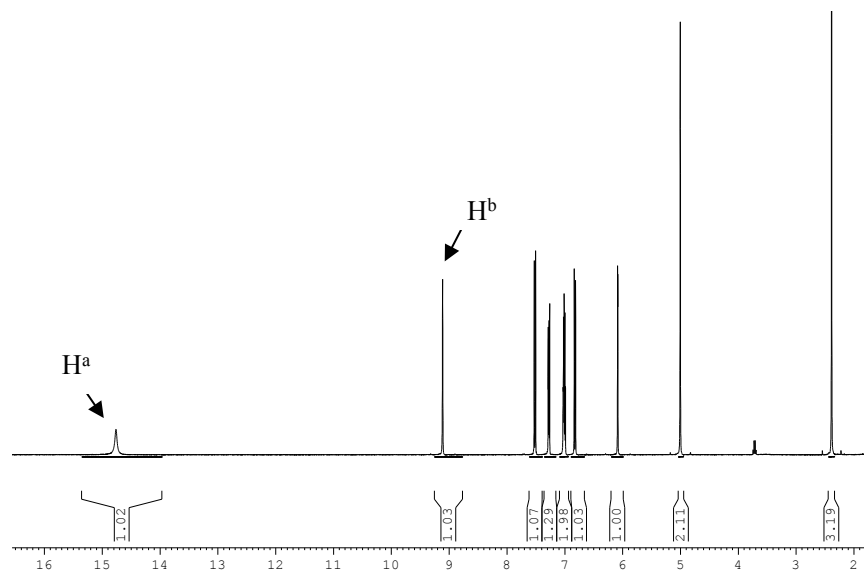

Figure S1.  $^1\text{H}$  NMR spectrum of ligand L in  $\text{dms-}d_6$  ( $\text{H}^a$  and  $\text{H}^b$  denote hydroxyl and iminic protons, respectively).<sup>31</sup>

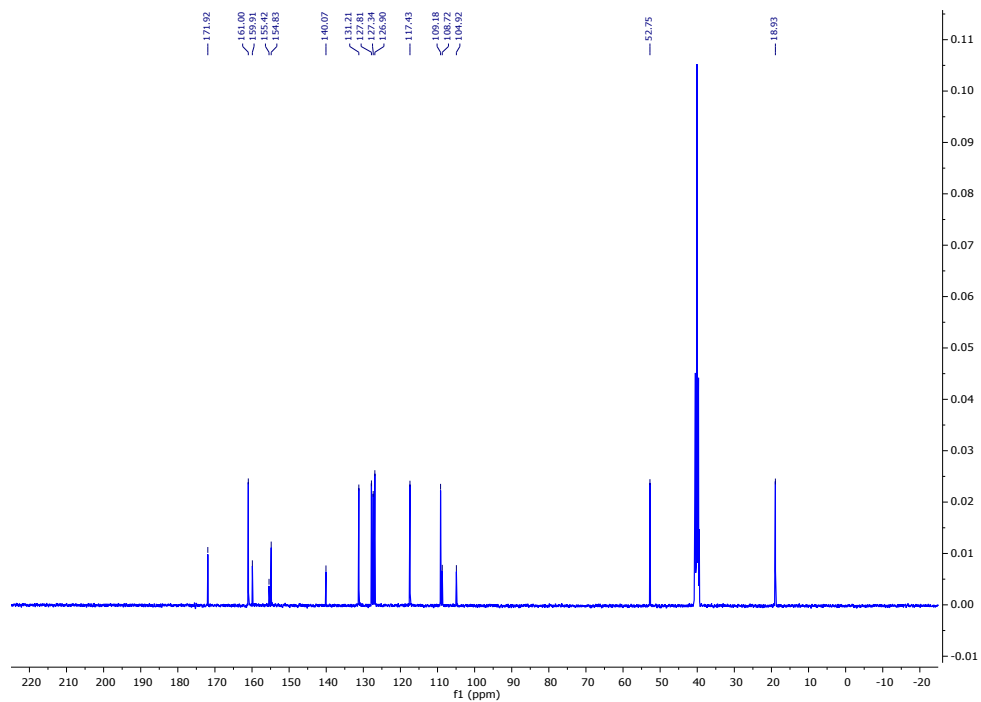

Figure S2.  $^{13}\text{C}$  NMR spectrum of ligand L in  $\text{dms-}d_6$ .

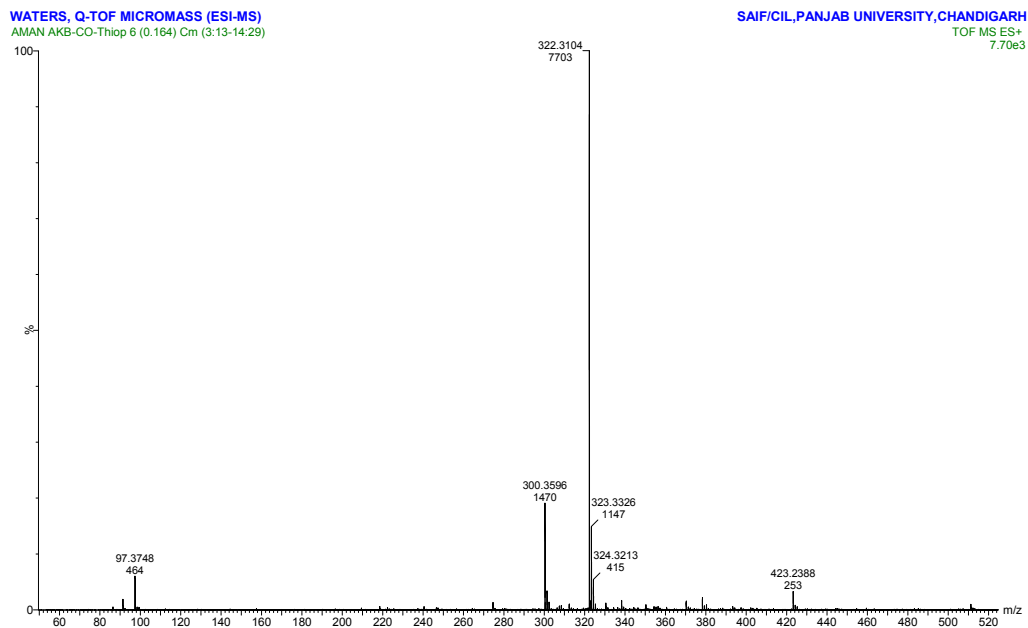

Figure S3. Mass spectrum of ligand L via electrospray ionization technique (positive mode)

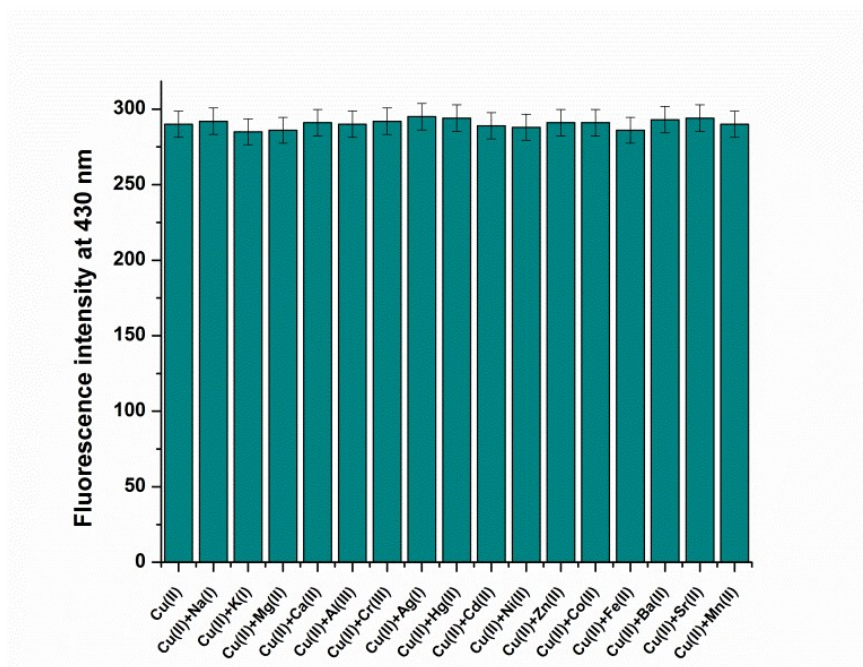

Figure S4. Competitive binding experiment of title ligand **A1** with  $\text{Cu}^{2+}$  in the presence of competing select metal ions.

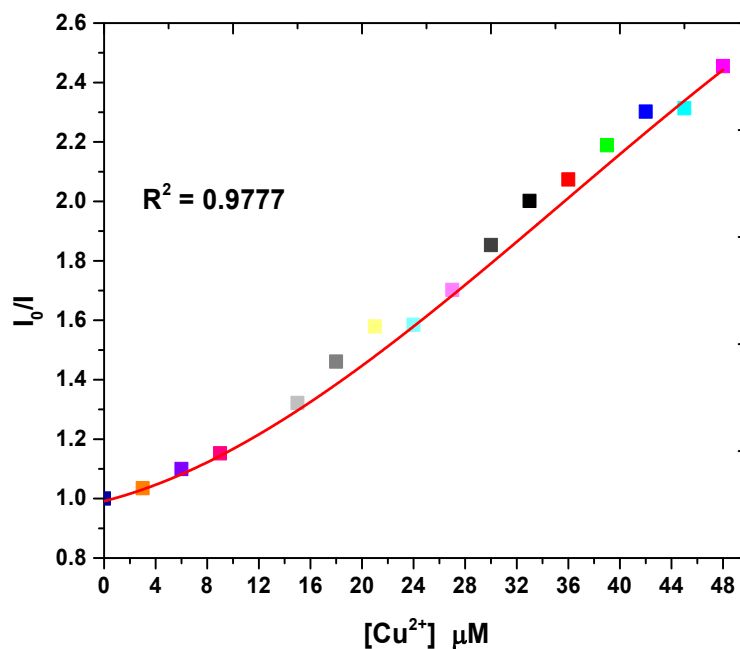

Figure S5. Stern-Volmer plot for determination of association constant ( $K_a$ ) between  $\text{Cu}^{2+}$  and organic nanoparticles **A1**

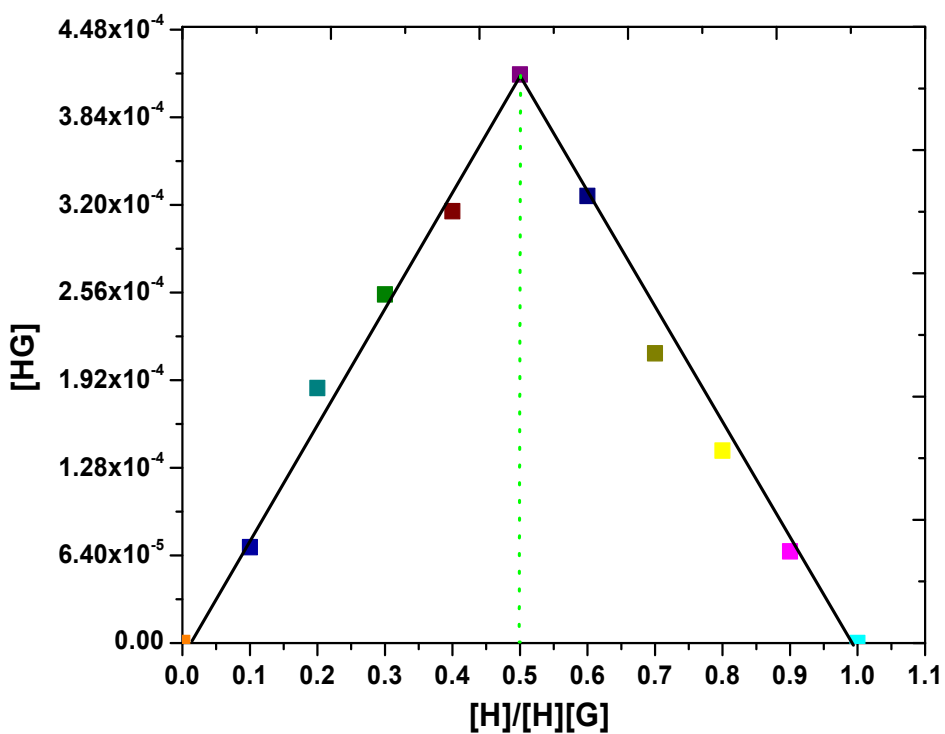

Figure S6. Job plot to determine the stoichiometry of the chemical coordination between the host ligand **A1** and guest metal ion  $\text{Cu}^{2+}$ .

Copper-bound receptor ligand A1

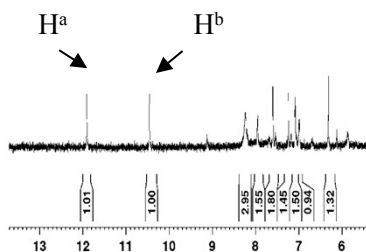

Copper-free receptor ligand A1

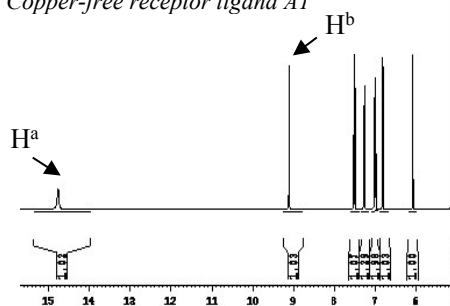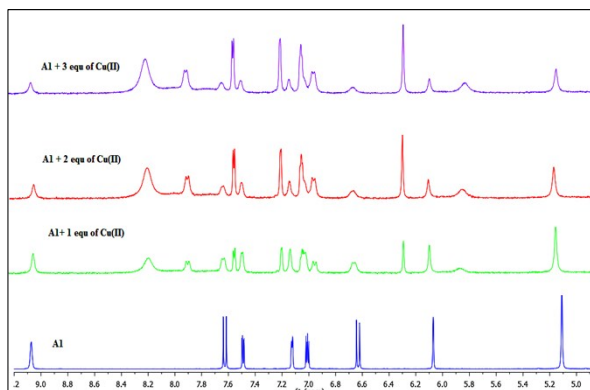

Figure S7.1  $^1\text{H}$  NMR titration of **A1** in presence and absence of  $\text{Cu}^{2+}$  in  $\text{dms}\text{-}d_6$  ( $\text{H}^a$  and  $\text{H}^b$  denote hydroxyl proton and iminic hydrogen of **A1**, respectively)

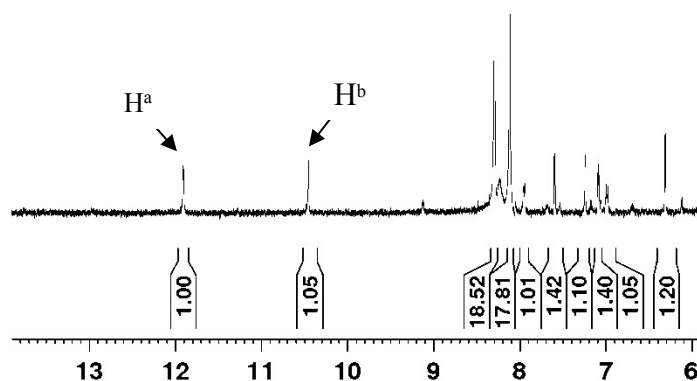

Figure S7.2  $^1\text{H}$  NMR titration of **A1** in presence of  $\text{Cu}^{2+}$  and azamethiphos in  $\text{dms}\text{-}d_6$  ( $\text{H}^a$  and  $\text{H}^b$  denote hydroxyl proton and iminic hydrogen of **A1**, respectively)

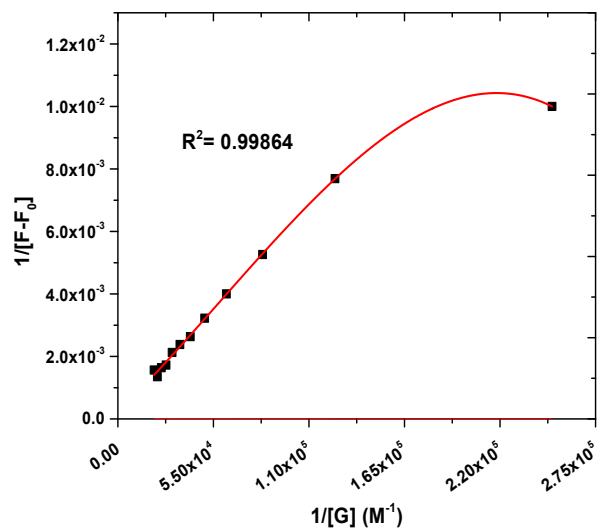

Figure S8. Benesi-Hildebrand plot to determine the binding constant between  $\text{Cu}^{2+}\text{-A1}$  with azamethiphos where  $F_0$  and  $F$  denote the fluorescence emission intensity of the copper-bound receptor complex  $\text{Cu}^{2+}\text{-A1}$  in the absence and presence of azamethiphos (analyte), respectively.  $[G]$  represents the molar concentration of azamethiphos.

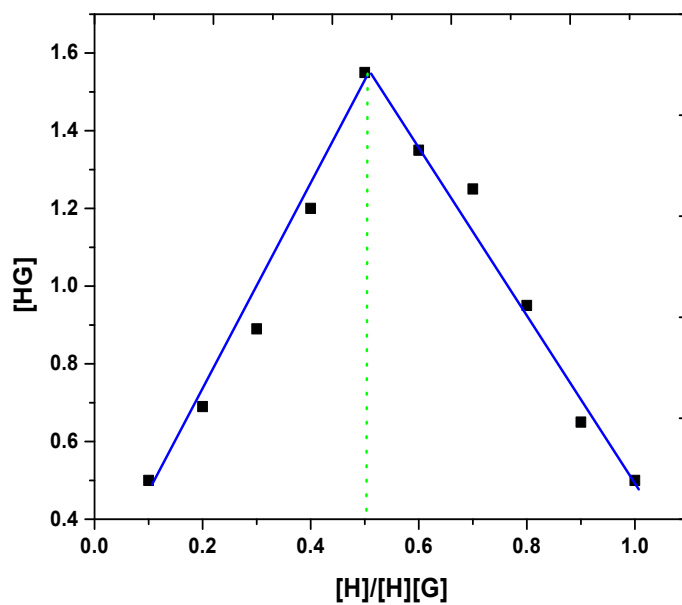

Figure S9. Job plot to determine the stoichiometry of the binding interaction between the host complex  $\text{Cu}^{2+}\text{-A1}$  and azamethiphos (analyte).  $[H]$  and  $[G]$  represent the molar concentration of the host complex  $\text{Cu}^{2+}\text{-A1}$  and azamethiphos, respectively



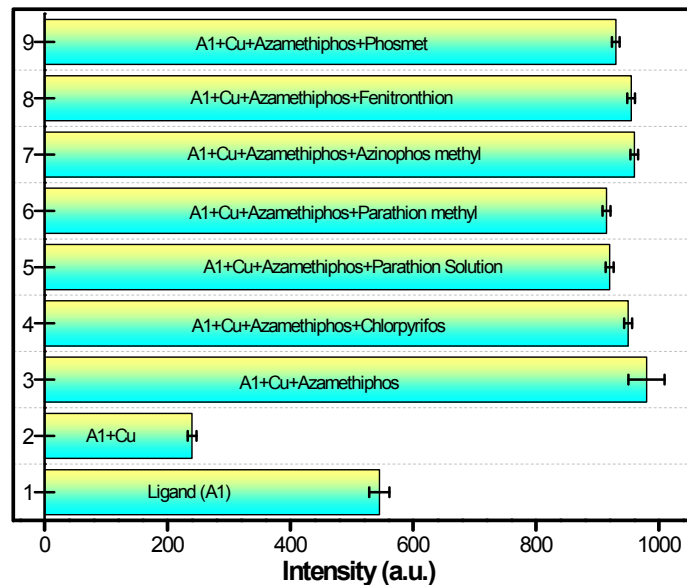

Figure S10. Competitive binding experiment of copper:ligand ensemble ( $\text{Cu}^{2+} \cdot \mathbf{A1}$  ;  $\lambda_{\text{em}} = 440 \text{ nm}$ ) towards azamethiphos in the presence of select organophosphate pesticides

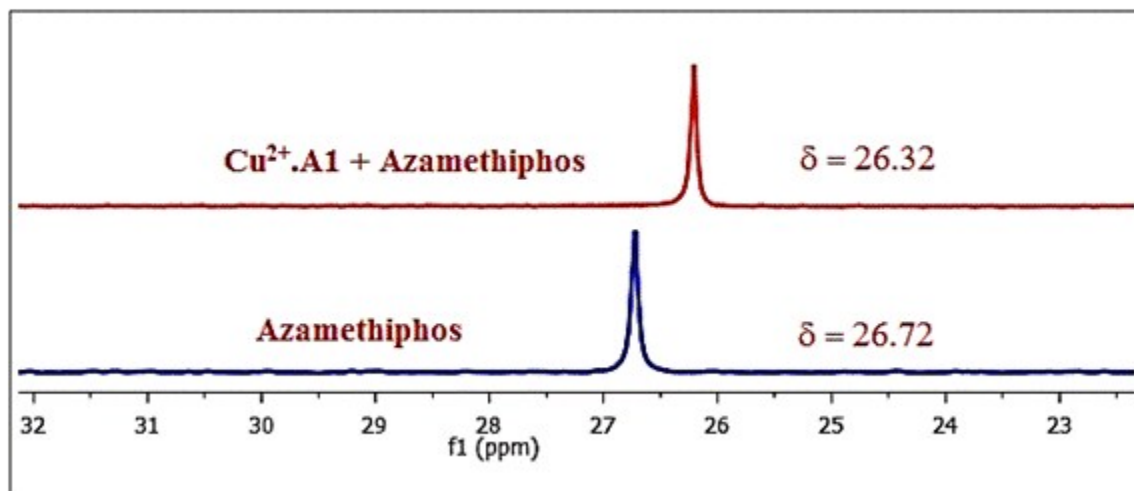

Figure S11.  $^{31}\text{P}$  NMR spectrum of azamethiphos in the presence and absence of copper-ligand ensemble,  $\text{Cu}^{2+} \cdot \mathbf{A1}$

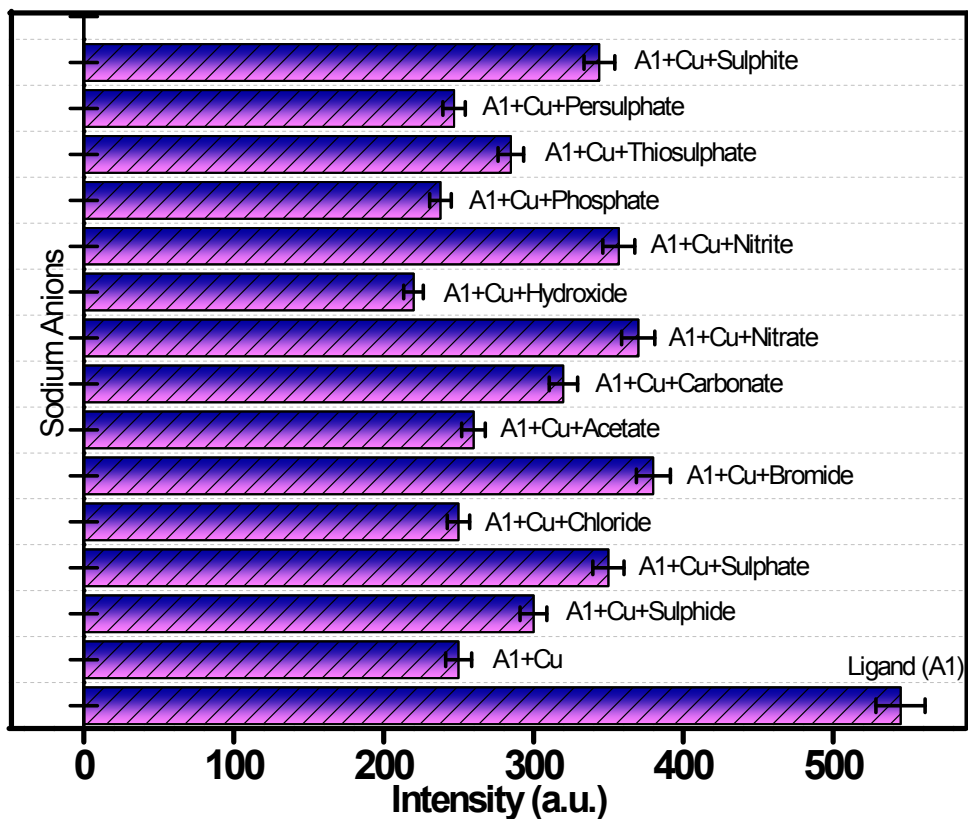

Figure S12. Fluorescence profile of  $\text{Cu}^{2+}$ -A1 ( $50\mu\text{M}$  ;  $\lambda_{\text{em}} = 430\text{nm}$ ) in presence of a library of select anions ( $50\mu\text{M}$ ) in aqueous medium.

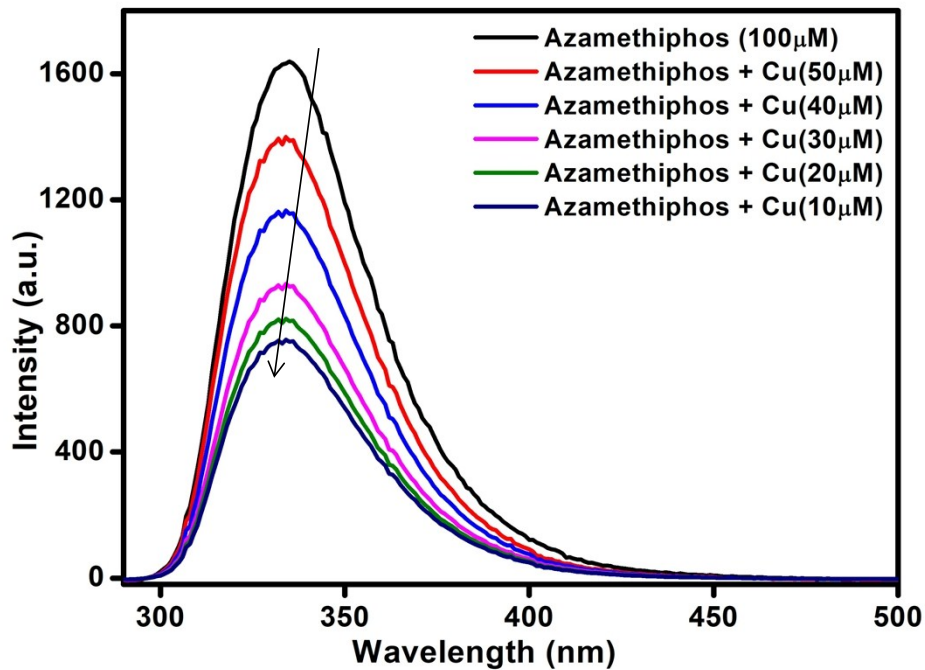

Figure S13. Fluorescence titration studies of azamethiphos (100 μM;  $\lambda_{em} = 330$  nm) with Cu<sup>2+</sup> (0-50 μM)

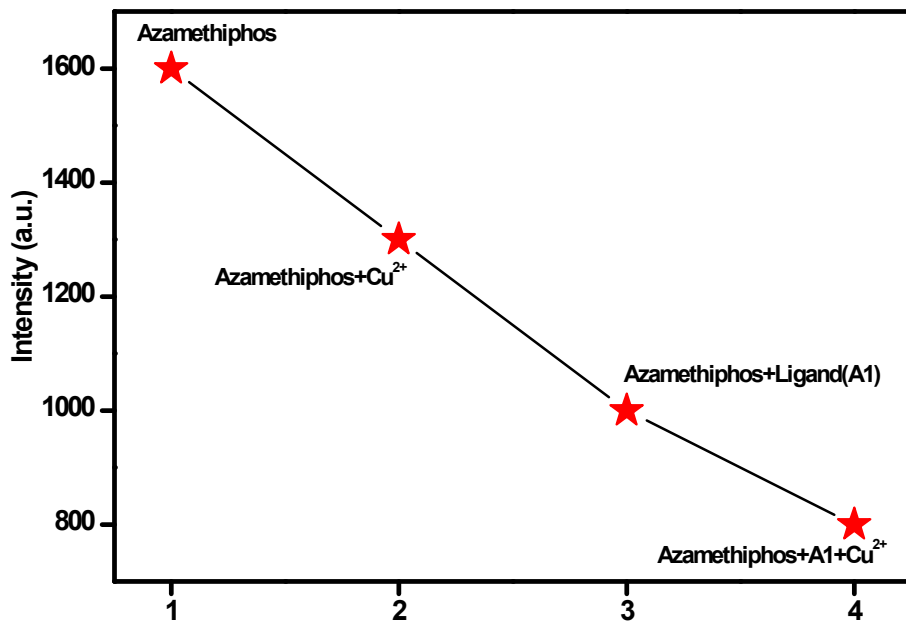

Figure S14. Fluorescence profile of azamethiphos ( $\lambda_{em} = 330$  nm) in the presence of (i) Cu<sup>2+</sup> (ii) ligand (A1) and (iii) ligand-copper ensemble (A1·Cu<sup>2+</sup>)

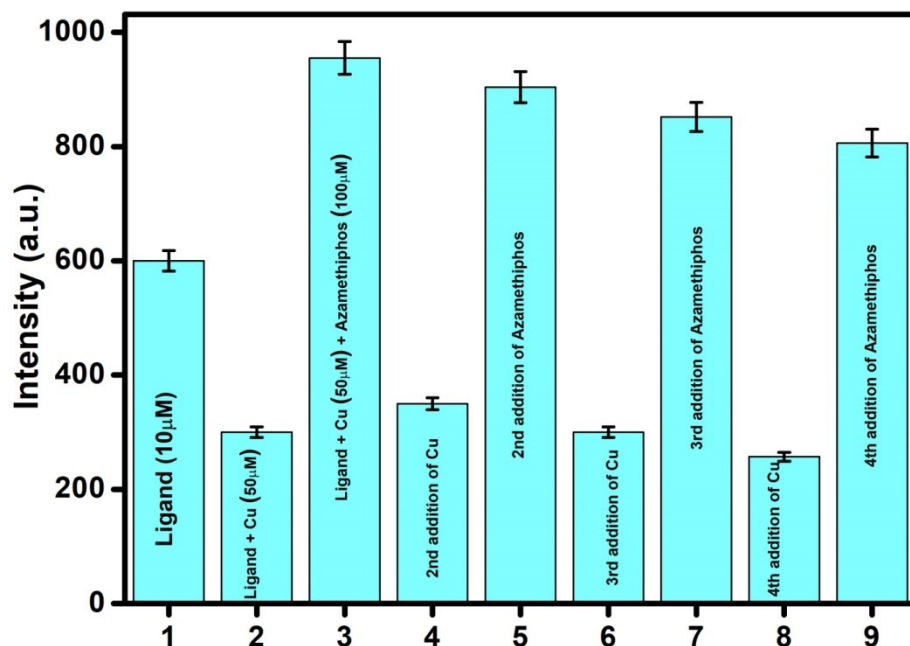

Figure S15. Cyclical fluctuations in fluorescence intensity of ligand A1 ( $\lambda_{em} = 430$  nm; 10  $\mu$ M) upon sequential dosage of azamethiphos (100 - 40  $\mu$ M) and Cu<sup>2+</sup> (50-20  $\mu$ M) in an alternate pattern.

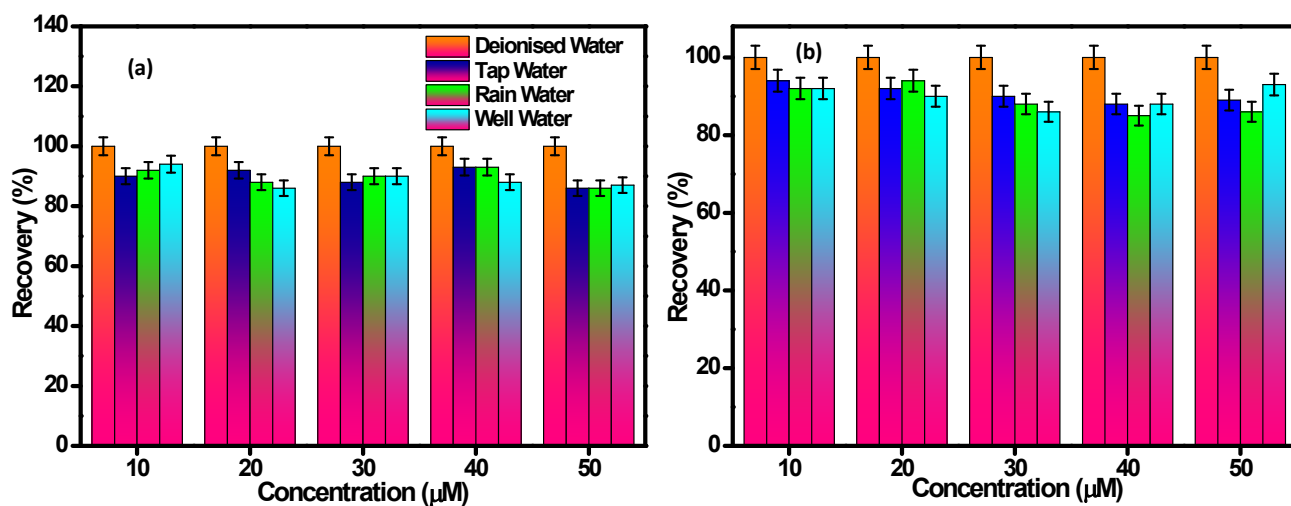

Figure S16. Fluorescence studies in deionized water and select real water samples (tap water, rain water and well water) of (a) A1 ( $\lambda_{em} = 430$  nm) upon spiking with Cu<sup>2+</sup> (10, 20, 30, 40 and 50  $\mu$ M) and (b) A1Cu<sup>2+</sup> ( $\lambda_{em} = 440$  nm) upon spiking with azamethiphos (10, 20, 30, 40 and 50  $\mu$ M)

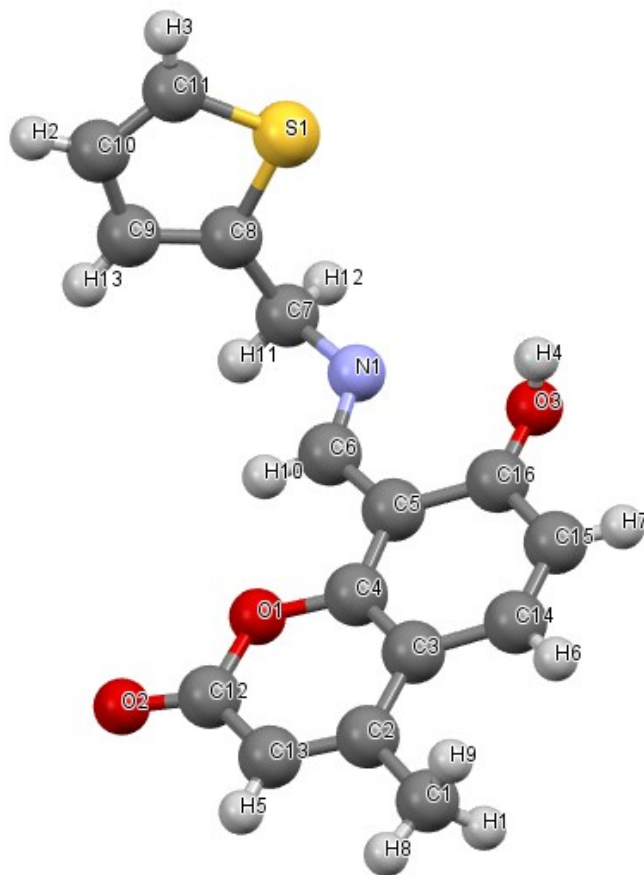

Figure S17. Fully labeled molecular structure of ligand L

Table S1. Crystal data and structure refinement for ligand L

|                        |                                                    |                        |
|------------------------|----------------------------------------------------|------------------------|
| Chemical formula       | <b>C<sub>16</sub>H<sub>13</sub>NO<sub>3</sub>S</b> |                        |
| Formula weight         | <b>299.33</b>                                      |                        |
| Temperature            | <b>296(2) K</b>                                    |                        |
| Wavelength             | <b>0.71073 Å</b>                                   |                        |
| Crystal system         | <b>Triclinic</b>                                   |                        |
| Space group            | <b>P -1</b>                                        |                        |
| Unit cell dimensions   | <b>a = 7.518(7) Å</b>                              | <b>α = 70.671(10)°</b> |
|                        | <b>b = 9.118(9) Å</b>                              | <b>β = 71.668(11)°</b> |
|                        | <b>c = 11.293(11) Å</b>                            | <b>γ = 78.323(11)°</b> |
| Volume                 | <b>689.2(11) Å<sup>3</sup></b>                     |                        |
| Z                      | <b>2</b>                                           |                        |
| Density (calculated)   | <b>1.442 g/cm<sup>3</sup></b>                      |                        |
| Absorption coefficient | <b>0.244 mm<sup>-1</sup></b>                       |                        |
| F(000)                 | <b>312</b>                                         |                        |

|                                     |                                                                                                                                                          |                                                                |
|-------------------------------------|----------------------------------------------------------------------------------------------------------------------------------------------------------|----------------------------------------------------------------|
| Theta range for data collection     | <b>1.98 to 25.16°</b>                                                                                                                                    |                                                                |
| Index ranges                        | <b>-8&lt;=h&lt;=8, -10&lt;=k&lt;=10, -13&lt;=l&lt;=13</b>                                                                                                |                                                                |
| Reflections collected               | <b>8677</b>                                                                                                                                              |                                                                |
| Independent reflections             | <b>2461 [R(int) = 0.0180]</b>                                                                                                                            |                                                                |
| Coverage of independent reflections | <b>99.9%</b>                                                                                                                                             |                                                                |
| Absorption correction               | <b>multi-scan</b>                                                                                                                                        |                                                                |
| Structure solution technique        | <b>direct methods</b>                                                                                                                                    |                                                                |
| Structure solution program          | <b>SHELXS-97 (Sheldrick, 2008)</b>                                                                                                                       |                                                                |
| Refinement method                   | <b>Full-matrix least-squares on F<sup>2</sup></b>                                                                                                        |                                                                |
| Refinement program                  | <b>SHELXL-97 (Sheldrick, 2008)</b>                                                                                                                       |                                                                |
| Function minimized                  | <b>Σ w(F<sub>o</sub><sup>2</sup> - F<sub>c</sub><sup>2</sup>)<sup>2</sup></b>                                                                            |                                                                |
| Data / restraints / parameters      | <b>2461 / 0 / 192</b>                                                                                                                                    |                                                                |
| Goodness-of-fit on F <sup>2</sup>   | <b>1.051</b>                                                                                                                                             |                                                                |
| Final R indices                     | <b>2186 data; I &gt; 2σ (I)<br/>all data</b>                                                                                                             | <b>R1 = 0.0460, wR2 = 0.1408<br/>R1 = 0.0503, wR2 = 0.1461</b> |
| Weighting scheme                    | <b>w=1/[σ<sup>2</sup>(F<sub>o</sub><sup>2</sup>)+(0.0917P)<sup>2</sup>+0.2923P]<br/>where P=(F<sub>o</sub><sup>2</sup>+2F<sub>c</sub><sup>2</sup>)/3</b> |                                                                |
| Largest diff. peak and hole         | <b>0.652 and -0.494 eÅ<sup>-3</sup></b>                                                                                                                  |                                                                |

Table S2. Bond lengths (Å) of L

|         |                 |         |                 |
|---------|-----------------|---------|-----------------|
| S1-C8   | 1.718(3)        | S1-C11  | 1.716(3)        |
| O1-C4   | <b>1.370(2)</b> | O1-C12  | <b>1.394(2)</b> |
| O2-C12  | <b>1.210(3)</b> | O3-C16  | <b>1.256(3)</b> |
| O3-H4   | <b>0.82</b>     | N1-C6   | <b>1.301(3)</b> |
| N1-C7   | <b>1.476(2)</b> | C1-C2   | <b>1.498(3)</b> |
| C1-H8   | <b>0.96</b>     | C1-H9   | <b>0.96</b>     |
| C1-H1   | <b>0.96</b>     | C2-C13  | <b>1.356(3)</b> |
| C2-C3   | <b>1.437(3)</b> | C3-C4   | <b>1.385(3)</b> |
| C3-C14  | <b>1.431(3)</b> | C4-C5   | <b>1.418(3)</b> |
| C5-C6   | <b>1.413(3)</b> | C5-C16  | <b>1.457(3)</b> |
| C6-H10  | <b>0.93</b>     | C7-C8   | <b>1.498(3)</b> |
| C7-H11  | <b>0.97</b>     | C7-H12  | <b>0.97</b>     |
| C8-C9   | <b>1.381(3)</b> | C9-C10  | <b>1.406(4)</b> |
| C9-H13  | <b>0.93</b>     | C10-C11 | <b>1.332(4)</b> |
| C10-H2  | <b>0.93</b>     | C11-H3  | <b>0.93</b>     |
| C12-C13 | <b>1.428(3)</b> | C13-H5  | <b>0.93</b>     |
| C14-C15 | <b>1.353(3)</b> | C14-H6  | <b>0.93</b>     |

|         |                 |        |             |
|---------|-----------------|--------|-------------|
| C15-C16 | <b>1.441(3)</b> | C15-H7 | <b>0.93</b> |
|---------|-----------------|--------|-------------|

Table S3. Bond angles (°) of L

|             |                   |            |                   |
|-------------|-------------------|------------|-------------------|
| C8-S1-C11   | 92.10(13)         | C4-O1-C12  | 121.98(14)        |
| C16-O3-H4   | <b>109.5</b>      | C6-N1-C7   | <b>122.80(16)</b> |
| C2-C1-H8    | <b>109.5</b>      | C2-C1-H9   | <b>109.5</b>      |
| H8-C1-H9    | <b>109.5</b>      | C2-C1-H1   | <b>109.5</b>      |
| H8-C1-H1    | <b>109.5</b>      | H9-C1-H1   | <b>109.5</b>      |
| C13-C2-C3   | <b>119.12(17)</b> | C13-C2-C1  | <b>120.65(18)</b> |
| C3-C2-C1    | <b>120.23(18)</b> | C4-C3-C14  | <b>116.83(18)</b> |
| C4-C3-C2    | <b>118.65(18)</b> | C14-C3-C2  | <b>124.51(17)</b> |
| O1-C4-C3    | <b>121.11(17)</b> | O1-C4-C5   | <b>115.37(15)</b> |
| C3-C4-C5    | <b>123.53(17)</b> | C6-C5-C4   | <b>120.25(17)</b> |
| C6-C5-C16   | <b>121.06(17)</b> | C4-C5-C16  | <b>118.68(16)</b> |
| N1-C6-C5    | <b>124.29(17)</b> | N1-C6-H10  | <b>117.9</b>      |
| C5-C6-H10   | <b>117.9</b>      | N1-C7-C8   | <b>112.65(16)</b> |
| N1-C7-H11   | <b>109.1</b>      | C8-C7-H11  | <b>109.1</b>      |
| N1-C7-H12   | <b>109.1</b>      | C8-C7-H12  | <b>109.1</b>      |
| H11-C7-H12  | <b>107.8</b>      | C9-C8-C7   | <b>126.54(19)</b> |
| C9-C8-S1    | <b>110.08(16)</b> | C7-C8-S1   | <b>123.37(16)</b> |
| C8-C9-C10   | <b>112.5(2)</b>   | C8-C9-H13  | <b>123.7</b>      |
| C10-C9-H13  | <b>123.7</b>      | C11-C10-C9 | <b>113.8(2)</b>   |
| C11-C10-H2  | <b>123.1</b>      | C9-C10-H2  | <b>123.1</b>      |
| C10-C11-S1  | <b>111.5(2)</b>   | C10-C11-H3 | <b>124.2</b>      |
| S1-C11-H3   | <b>124.3</b>      | O2-C12-O1  | <b>115.57(17)</b> |
| O2-C12-C13  | <b>127.85(18)</b> | O1-C12-C13 | <b>116.58(17)</b> |
| C2-C13-C12  | <b>122.53(18)</b> | C2-C13-H5  | <b>118.7</b>      |
| C12-C13-H5  | <b>118.7</b>      | C15-C14-C3 | <b>122.29(17)</b> |
| C15-C14-H6  | <b>118.9</b>      | C3-C14-H6  | <b>118.9</b>      |
| C14-C15-C16 | <b>122.17(18)</b> | C14-C15-H7 | <b>118.9</b>      |
| C16-C15-H7  | <b>118.9</b>      | O3-C16-C15 | <b>122.47(18)</b> |
| O3-C16-C5   | <b>121.03(17)</b> | C15-C16-C5 | <b>116.49(18)</b> |
